# Supplementary figures and images for: Towards scalable production of a collagen-like protein from Streptococcus pyogenes for biomedical applications
Source: Springer Nature journal article supplement (doi:10.1186/1475-2859-11-146), 2012-11-05

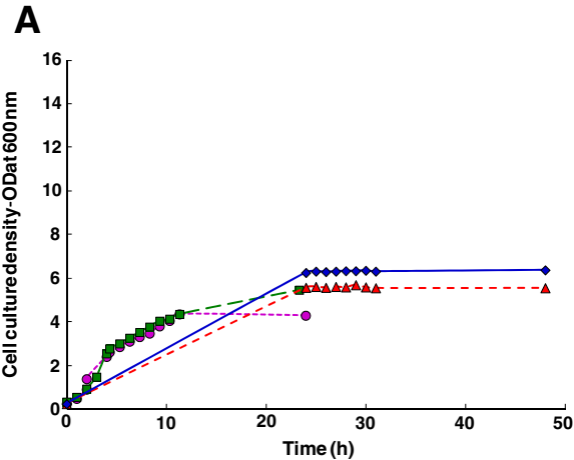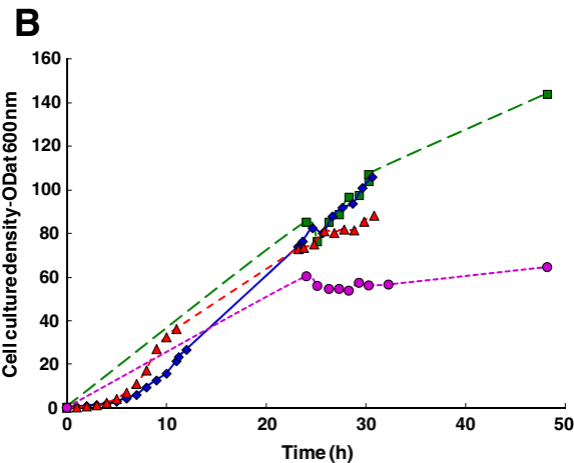

Supplement: 12934_2012_775_MOESM3_ESM.pdf [file 12934_2012_775_MOESM3_ESM.pdf]
